# Supplementary material for: The course of multiple sclerosis rewritten: a Norwegian population-based study on disease demographics and progression
Source: PubMed Central journal article supplement (PMC7990804; doi:10.1007/s00415-020-10279-7), 2020-10-22
Supplement: 415_2020_10279_MOESM1_ESM.pdf [file 415_2020_10279_MOESM1_ESM.pdf]

**Supplementary tables 1 and 2**

**The Course of Multiple Sclerosis Rewritten:  
A Norwegian Population Based Study on Disease Demographics and Progression**

*Cecilia Smith Simonsen<sup>1,3,4</sup>, Heidi Øyen Flemmen<sup>2,5</sup>, Line Broch<sup>1,3,4</sup>, Cathrine Brunborg<sup>6</sup>, Pål Berg-Hansen<sup>3</sup>,  
Stine Marit Moen<sup>7</sup>, Elisabeth Gulowsen Celius<sup>3,4</sup>*

<sup>1</sup>*Department of Neurology, Vestre Viken Hospital Trust, Drammen, Norway*

<sup>2</sup>*Department of Neurology, Hospital Telemark HF, Skien, Norway*

<sup>3</sup>*Department of Neurology, Oslo University Hospital, Norway*

<sup>4</sup>*Institute of Clinical Medicine, University of Oslo, Norway*

<sup>5</sup>*Institute of Health and Society, University of Oslo, Norway*

<sup>6</sup>*Oslo Centre for Biostatistics and Epidemiology, Research Support Services, Oslo University Hospital, Norway*

<sup>7</sup>*MS-Centre Hakadal, Norway*

**Corresponding author:**

Cecilia Smith Simonsen (MD):

Department of Neurology, Vestre Viken Hospital Trust, Dronninggaten, 3004 Drammen, Norway

Email: [cecsim@vestreviken.no](mailto:cecsim@vestreviken.no)

Phone number: +47 98 67 32 56

|                                                           |                   | Unadjusted           |             |          |                      |             |          | Adjusted             |             |          |                      |             |          |
|-----------------------------------------------------------|-------------------|----------------------|-------------|----------|----------------------|-------------|----------|----------------------|-------------|----------|----------------------|-------------|----------|
| Group                                                     | Year of diagnosis | BT                   |             |          | Non-BT               |             |          | BT                   |             |          | Non-BT               |             |          |
|                                                           |                   | <i>(n=7991 EDSS)</i> |             |          | <i>(n=5084 EDSS)</i> |             |          | <i>(n=7782 EDSS)</i> |             |          | <i>(n=4931 EDSS)</i> |             |          |
|                                                           |                   | Coef.                | 95% CI      | <i>p</i> | Coef.                | 95% CI      | <i>p</i> | Coef.                | 95% CI      | <i>p</i> | Coef.                | 95% CI      | <i>p</i> |
| <b>Age at EDSS</b>                                        |                   | 0.157                | 0.128<br>-  | <0.001   | 0.124                | 0.101<br>-  | <0.001   | 0.161                | 0.141<br>-  | <0.001   | 0.127                | 0.104<br>-  | <0.001   |
|                                                           |                   |                      | 0.176       |          | 0.146                |             |          | 0.180                |             |          | 0.150                |             |          |
| <b>G2</b>                                                 | 1998-2002         | <i>Reference</i>     |             |          |                      |             |          | <i>Reference</i>     |             |          |                      |             |          |
| <b>Diagnostic group</b>                                   |                   |                      |             |          |                      |             |          |                      |             |          |                      |             |          |
| <b>G1</b>                                                 | <1998             | 1.966                | 0.841<br>-  | 0.001    | 1.632                | 0.401<br>-  | 0.009    | 1.709                | 0.593<br>-  | 0.003    | 1.527                | 0.309<br>-  | 0.01     |
|                                                           |                   |                      | 3.090       |          | 2.864                |             |          | 2.826                |             |          | 2.745                |             |          |
| <b>G3</b>                                                 | 2003-2007         | 0.821                | -0.445<br>- | 0.20     | 0.195                | -1.145<br>- | 0.78     | 0.766                | -0.472<br>- | 0.23     | 0.161                | -1.156<br>- | 0.81     |
|                                                           |                   |                      | 2.088       |          | 1.536                |             |          | 2.004                |             |          | 1.477                |             |          |
| <b>G4</b>                                                 | 2008-2012         | 3.305                | 2.068<br>-  | <0.001   | 1.380                | 0.056<br>-  | 0.04     | 3.153                | 1.934<br>-  | <0.001   | 1.107                | -0.198<br>- | 0.10     |
|                                                           |                   |                      | 4.542       |          | 2.704                |             |          | 4.372                |             |          | 2.413                |             |          |
| <b>G5</b>                                                 | 2013-2017         | 3.948                | 2.414<br>-  | <0.001   | 2.707                | 1.170<br>-  | 0.001    | 2.628                | 1.098<br>-  | 0.001    | 2.029                | 0.506<br>-  | 0.009    |
|                                                           |                   |                      | 5.481       |          | 4.245                |             |          | 4.158                |             |          | 3.552                |             |          |
| <b>Diagnostic group by age of EDSS (interaction term)</b> |                   |                      |             |          |                      |             |          |                      |             |          |                      |             |          |
| <b>G1</b>                                                 | <1998             | -0.014               | -0.038<br>- | 0.20     | -0.022               | -0.049<br>- | 0.12     | -0.016               | -0.040<br>- | 0.20     | -0.025               | -0.052<br>- | 0.08     |
|                                                           |                   |                      | 0.010       |          | 0.006                |             |          | 0.008                |             |          | 0.003                |             |          |
| <b>G3</b>                                                 | 2003-2007         | -0.025               | -0.052<br>- | 0.07     | -0.009               | -0.400<br>- | 0.54     | -0.023               | -0.050<br>- | 0.09     | -0.006               | -0.036<br>- | 0.71     |
|                                                           |                   |                      | 0.002       |          | 0.021                |             |          | 0.003                |             |          | 0.024                |             |          |
| <b>G4</b>                                                 | 2008-2012         | -0.089               | -0.116<br>- | <0.001   | -0.048               | -0.078<br>- | 0.002    | -0.084               | -0.110<br>- | <0.001   | -0.036               | -0.066<br>- | 0.02     |
|                                                           |                   |                      | -0.063      |          | -0.017               |             |          | 0.057                |             |          | -0.006               |             |          |
| <b>G5</b>                                                 | 2013-2017         | -0.110               | -0.143<br>- | <0.001   | 0.082                | -0.118<br>- | <0.001   | -0.076               | -0.111<br>- | <0.001   | -0.057               | -0.093<br>- | 0.002    |
|                                                           |                   |                      | -0.076      |          | -0.046               |             |          | 0.042                |             |          | -0.020               |             |          |
| <b>Intercept</b>                                          |                   | -4.039               | -4.94<br>-  | <0.001   | -2.621               | 3.635<br>-  | <0.001   | -1.655               | -2.739<br>- | 0.003    | -1.095               | -2.271<br>- | 0.07     |
|                                                           |                   |                      | -3.135      |          | 1.608                |             |          | -0.570               |             |          | 0.081                |             |          |

**Supplementary table 1:** Results from linear mixed-effects regression analyses (unadjusted and adjusted) of EDSS progression over time by diagnostic groups stratified on cohort. Adjusted for months spent on all disease modifying treatment, progressive MS at onset, age at onset and gender. Non-BT: everyone in BOT-1 who does not reside in Buskerud or Telemark. Coef.: regression coefficient, EDSS: expanded disability status scale

|                                                           |                   | Unadjusted                       |                        |        |                                  |                       |        | Adjusted                         |                       |        |                                  |                       |        |
|-----------------------------------------------------------|-------------------|----------------------------------|------------------------|--------|----------------------------------|-----------------------|--------|----------------------------------|-----------------------|--------|----------------------------------|-----------------------|--------|
| Group                                                     | Year of diagnosis | Progressive at onset<br>(n=1317) |                        |        | Relapsing at onset<br>(n=10 949) |                       |        | Progressive at onset<br>(n=1256) |                       |        | Relapsing at onset<br>(n=10 751) |                       |        |
|                                                           |                   | Coef.                            | 95% CI                 | p      | Coef.                            | 95% CI                | p      | Coef.                            | 95% CI                | p      | Coef.                            | 95% CI                | p      |
| Age at EDSS                                               |                   | 0.188                            | 0.145<br>-<br>0.231    | <0.001 | 0.137                            | 0.121<br>-<br>0.153   | <0.001 | 0.198                            | 0.157<br>-<br>0.240   | <0.001 | 0.140                            | 0.123<br>-<br>0.156   | <0.001 |
| G2                                                        | 1998-2002         | Reference                        |                        |        |                                  |                       |        | Reference                        |                       |        |                                  |                       |        |
| <b>Diagnostic group</b>                                   |                   |                                  |                        |        |                                  |                       |        |                                  |                       |        |                                  |                       |        |
| G1                                                        | <1998             | 3.399                            | 0.274<br>-<br>6.524    | 0.033  | 1.351                            | 0.447<br>-<br>2.256   | 0.003  | 3.077                            | 0.103<br>-<br>6.051   | 0.043  | 1.291                            | 0.395<br>-<br>2.186   | 0.005  |
| G3                                                        | 2003-2007         | -2.628                           | -6.145<br>-<br>0.890   | 0.143  | 0.887                            | -0.086<br>-<br>1.860  | 0.074  | -2.019                           | -5.310<br>-<br>1.271  | 0.229  | 0.737                            | -0.219<br>-<br>1.693  | 0.131  |
| G4                                                        | 2008-2012         | -2.572                           | -6.145<br>-<br>1.002   | 0.158  | 3.073                            | 2.121<br>-<br>4.025   | <0.001 | -1.907                           | -5.319<br>-<br>1.506  | 0.273  | 2.659                            | 1.719<br>-<br>3.599   | <0.001 |
| G5                                                        | 2013-2017         | 1.482                            | -3.767<br>-<br>6.730   | 0.580  | 3.730                            | 2.597<br>-<br>4.864   | <0.001 | -2.000                           | -6.813<br>-<br>2.812  | 0.415  | 2.657                            | 1.512<br>-<br>3.782   | <0.001 |
| <b>Diagnostic group by age of EDSS (interaction term)</b> |                   |                                  |                        |        |                                  |                       |        |                                  |                       |        |                                  |                       |        |
| G1                                                        | <1998             | -0.054                           | -0.107<br>-<br>-0.0004 | 0.048  | -0.009                           | -0.029<br>-<br>0.012  | 0.40   | -0.057                           | -0.109<br>-<br>-0.005 | 0.031  | -0.010                           | -0.031<br>-<br>0.010  | 0.325  |
| G3                                                        | 2003-2007         | 0.024                            | -0.036<br>-<br>0.084   | 0.437  | -0.023                           | -0.045<br>-<br>-0.001 | 0.038  | 0.022                            | -0.036<br>-<br>0.080  | 0.456  | -0.020                           | 0.042<br>-<br>0.002   | 0.082  |
| G4                                                        | 2008-2012         | 0.015                            | -0.046<br>-<br>0.077   | 0.628  | -0.084                           | -0.106<br>-<br>-0.063 | <0.001 | 0.014                            | -0.046<br>-<br>0.074  | 0.654  | -0.073                           | -0.095<br>-<br>0.051  | <0.001 |
| G5                                                        | 2013-2017         | -0.070                           | -0.159<br>-<br>-0.019  | 0.124  | -0.105                           | 0.131<br>-<br>-0.078  | <0.001 | 0.008                            | -0.076<br>-<br>0.091  | 0.855  | -0.075                           | -0.101<br>-<br>-0.047 | <0.001 |
| Intercept                                                 |                   | -4.679                           | -7.189<br>-<br>-2.168  | <0.001 | -3.278                           | -3.998<br>-<br>-2.557 | <0.001 | 0.920                            | -1.782<br>-<br>3.622  | 0.505  | -1.460                           | -2.311<br>-<br>-0.608 | 0.001  |

*Supplementary table 2: Results from linear mixed-effects regression analyses (unadjusted and adjusted) of EDSS progression over time by diagnostic groups stratified on cohort in progressive and relapsing patients Adjusted for months spent on all disease modifying treatment, age at onset and gender, Coef.: regression coefficient, EDSS: expanded disability status scale.*
